# Supplementary material for: Hygroscopic behavior and chemical composition evolution of internally mixed aerosols composed of oxalic acid and ammonium sulfate
Source: Copernicus journal article supplement (doi:10.5194/acp-2017-454), 2017-05-29
Supplement: Supplementary file 1 [file acp-2017-454-supplement.pdf]

Supplement of

## Hygroscopic behavior and chemical composition evolution of internally mixed aerosols composed of oxalic acid and ammonium sulfate

Xiaowei Wang, Bo Jing, Fang Tan, Jiabi Ma, Yunhong Zhang and Maofa Ge

Correspondence to: Yunhong Zhang (yhz@bit.edu.cn) and Maofa Ge (gemaofa@iccas.ac.cn)

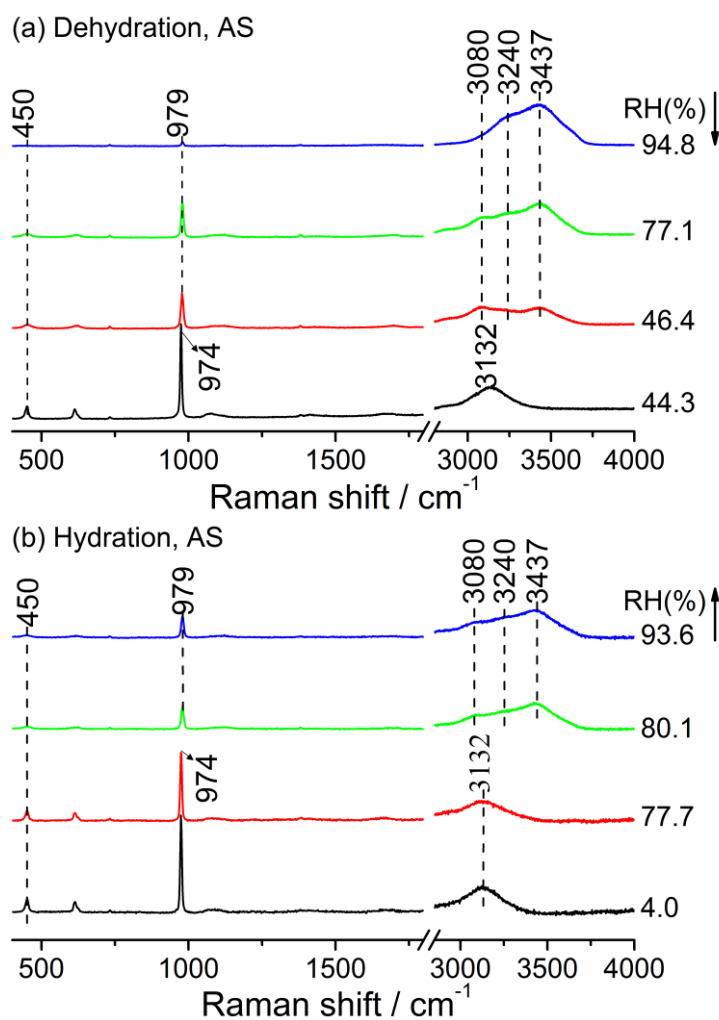

**Figure S1.** Raman spectra of  $(\text{NH}_4)_2\text{SO}_4$  droplets at various RH values during the (a) dehydration process and (b) hydration process.

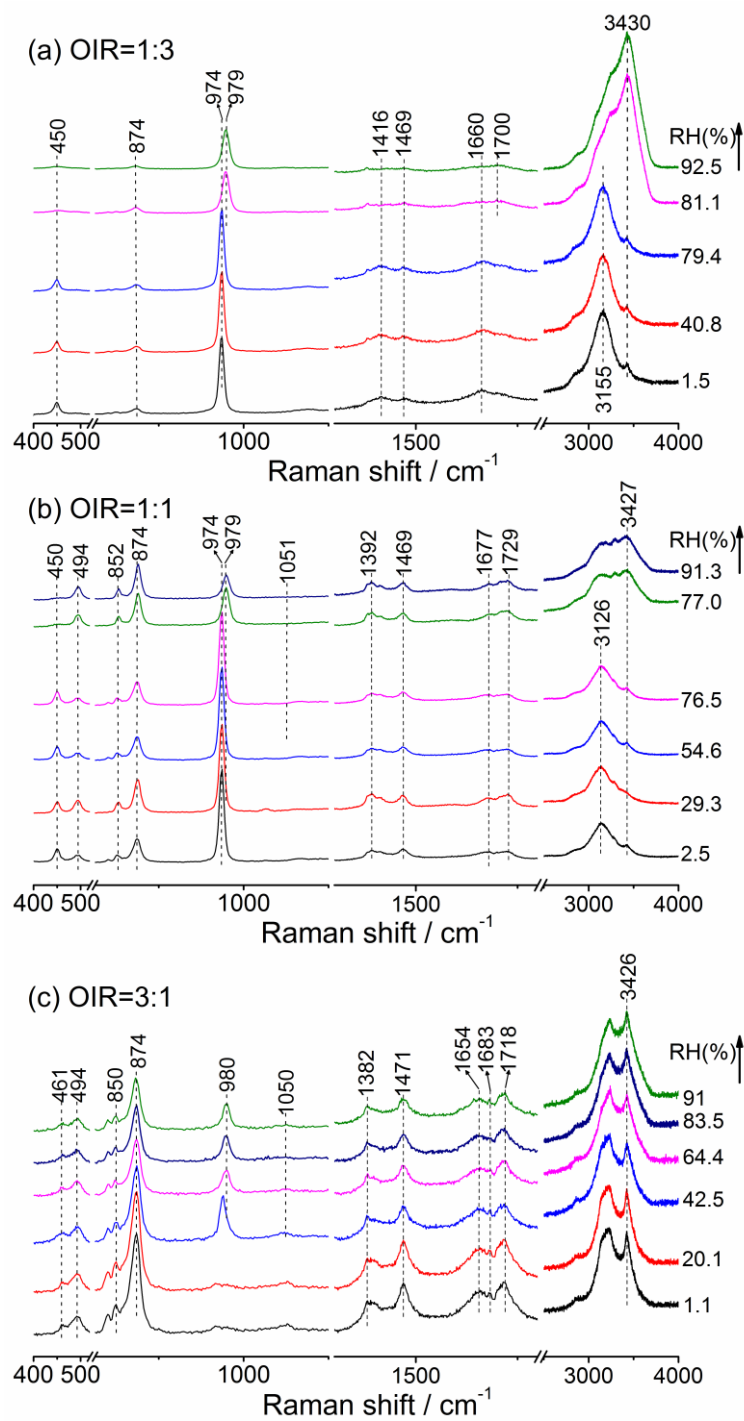

**Figure S2.** Raman spectra of mixed oxalic acid/ammonium sulfate droplets with OIRs of (a) 1:3 (b) 1:1 (c) 3:1 at various RH values during the hydration process.
